# Supplementary material for: Anti-Inflammatory Effects of Heliangin from Jerusalem Artichoke (Helianthus tuberosus) Leaves Might Prevent Atherosclerosis
Source: MDPI journal article supplement (doi:10.3390/biom12010091), 2022-01-06
Supplement: s1 [file s1]

## Supplementary Information

# Anti-inflammatory effects of heliangin from Jerusalem artichoke (*Helianthus tuberosus*) leaves might prevent atherosclerosis

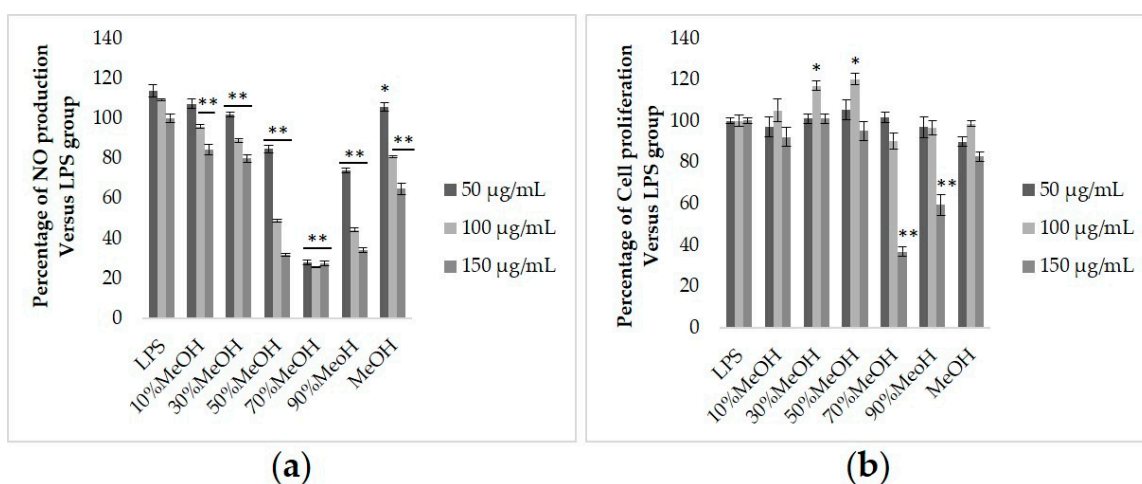

**Figure S1.** Effects of fractions separated using Sep-PaktC18 on RAW 264.7 cells stimulated with LPS. (a) Inhibition of NO production. (b) Cell proliferation. Values are shown as mean  $\pm$  SD ( $n = 4$ ). \* $p < 0.05$  and \*\* $p < 0.001$  vs. LPS (ANOVA with post hoc Dunnett tests).

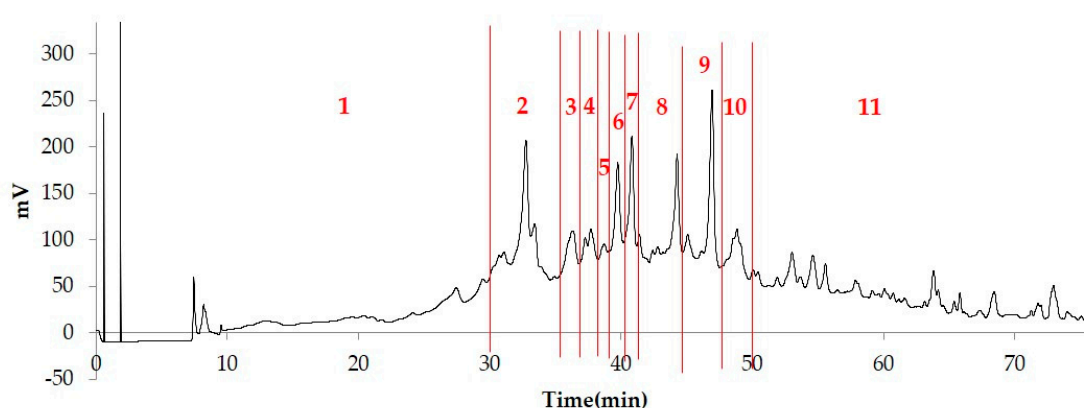

**Figure S2.** Compounds separated by HPLC from 50% methanol fraction.

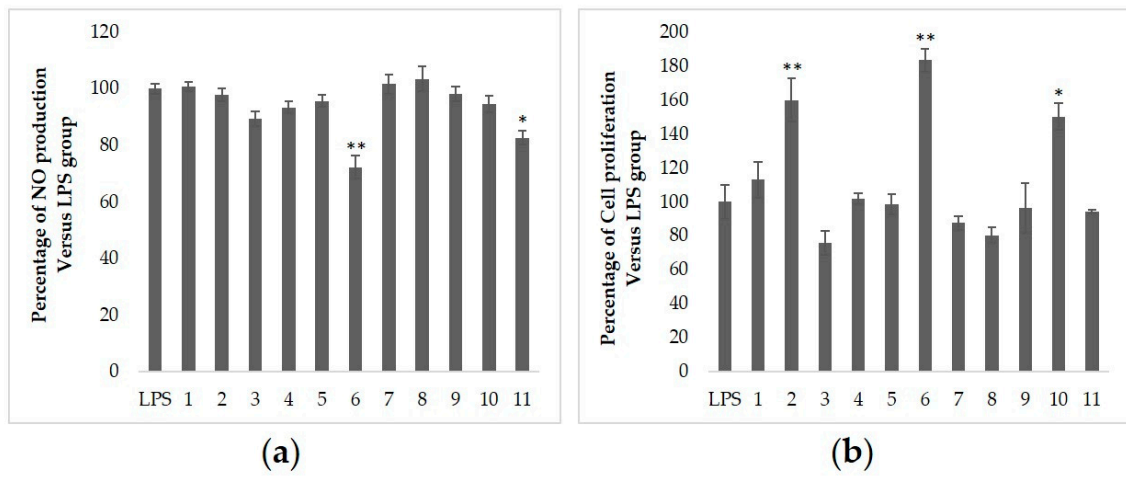

**Figure S3.** Effects of fractions separated by HPLC in RAW 264.7 cells stimulated with LPS. **(a)** Inhibition of NO production. **(b)** Cell proliferation. Values are shown as mean  $\pm$  SD ( $n = 4$ ) \* $p < 0.01$  and \*\* $p < 0.001$  vs. LPS (ANOVA with post hoc Dunnett tests).

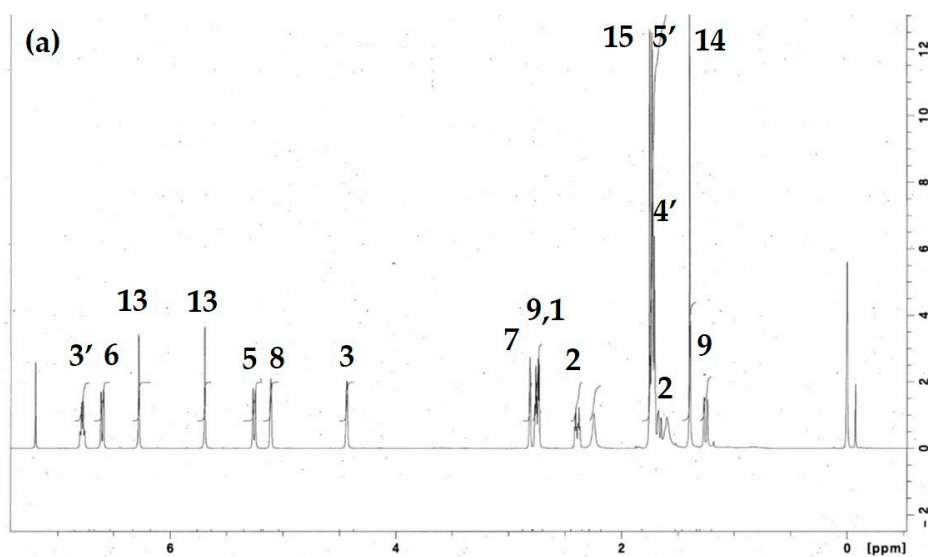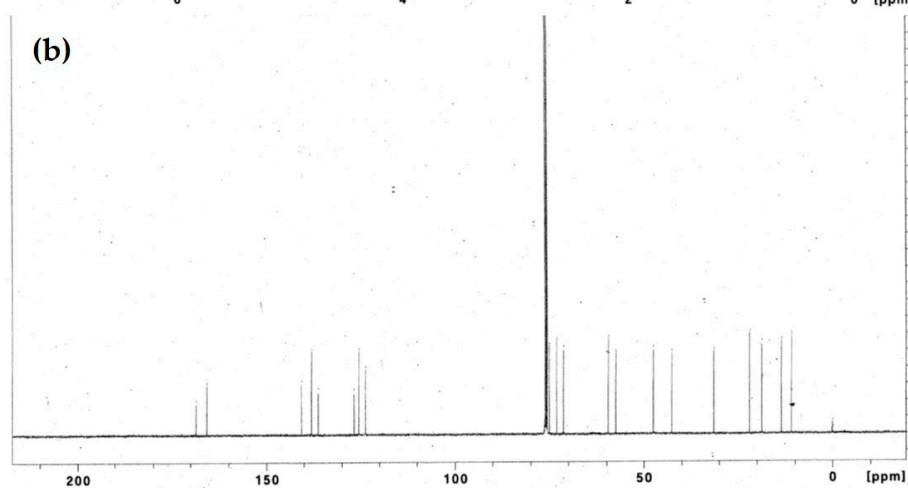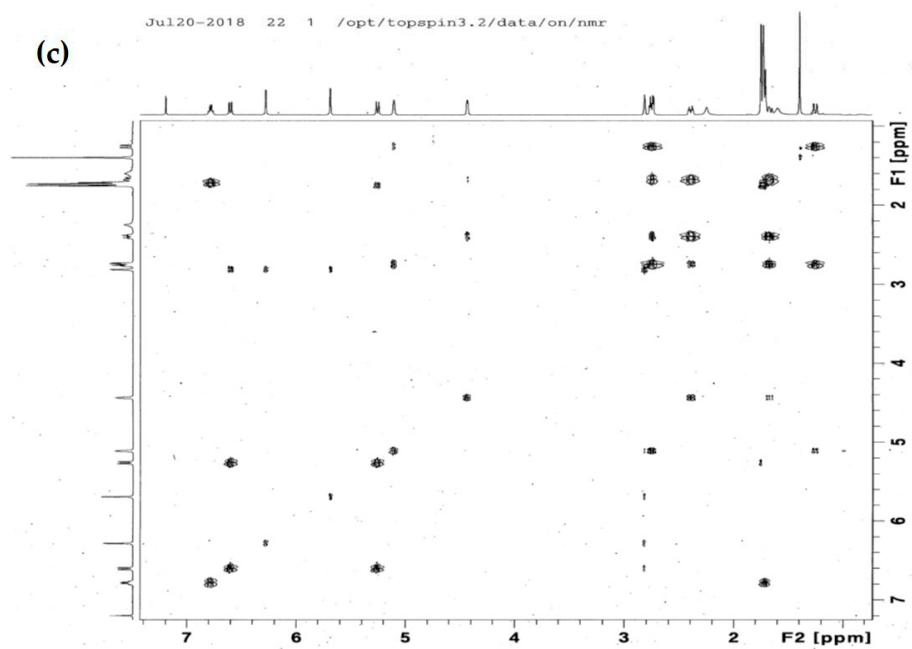

**Figure S4.** The one-dimensional (a)  $^1\text{H}$  and (b)  $^{13}\text{C}$  and (c) two-dimensional COSY spectra of heliangin.

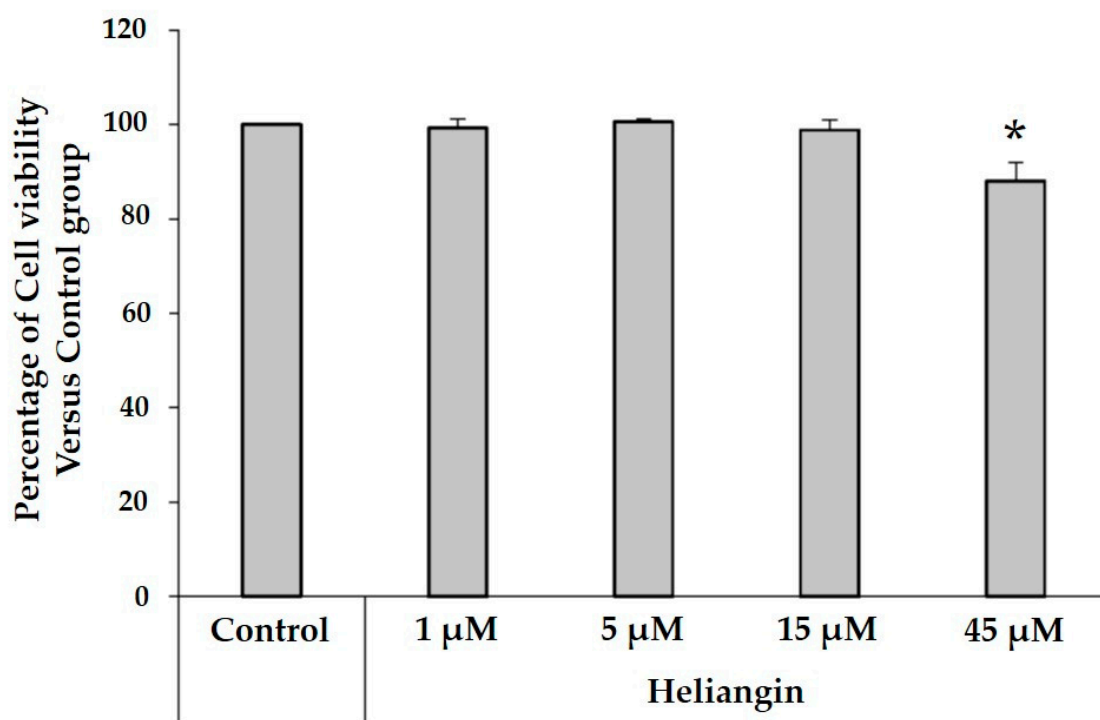

**Figure S5.** Effect of heliangin on VEC viability.

Vascular endothelial cells were treated with heliangin at 1, 5, 15 and 45  $\mu\text{M}$  for 24 h. The cell viability was determined by trypan blue staining assay. Values are shown as means  $\pm$  SD ( $n = 4$ )  $P < 0.05$  vs. \*Control (ANOVA with post hoc Dunnett tests).

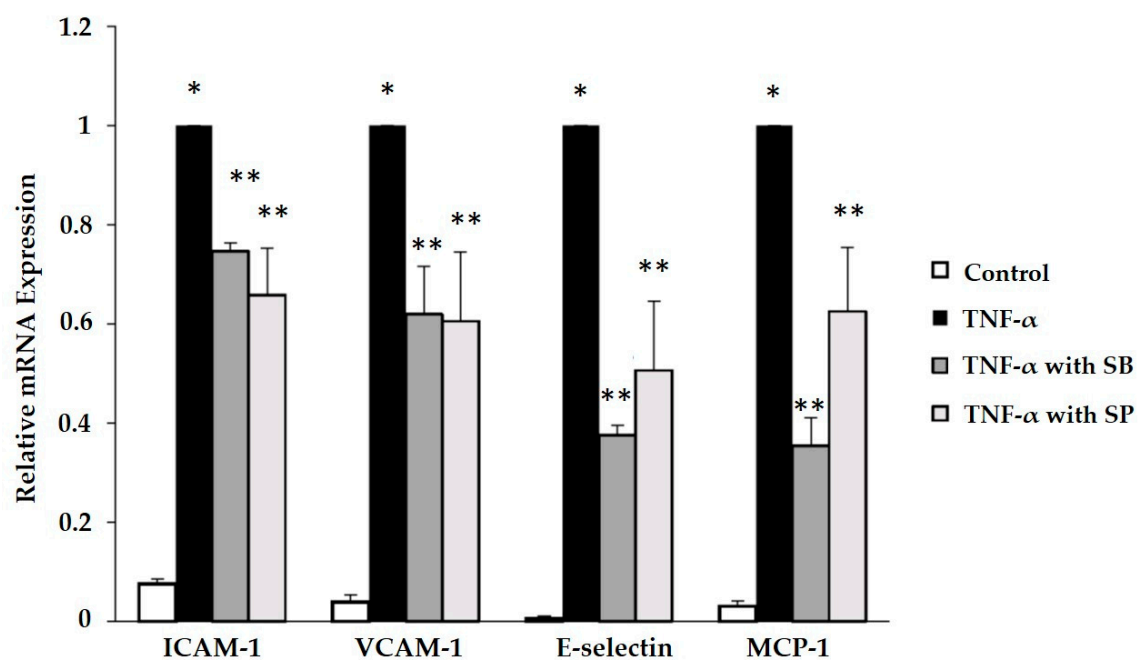

**Figure S6.** Inhibition of TNF- $\alpha$  in VECs.

Vascular endothelial cells were treated with 10  $\mu$ M SB20358015 (SB) and 10  $\mu$ M SP600125 (SP) for 1 h. Then, VECs were incubated with 2 ng/mL TNF- $\alpha$  for 3 h. The mRNA expression levels of ICAM, VCAM, E-selectin and MCP-1 were measured. Values are shown as means  $\pm$  SD (n = 4) \*p < 0.05 vs. Control and † p < 0.05 vs. TNF- $\alpha$  (ANOVA with Tukey's Test).

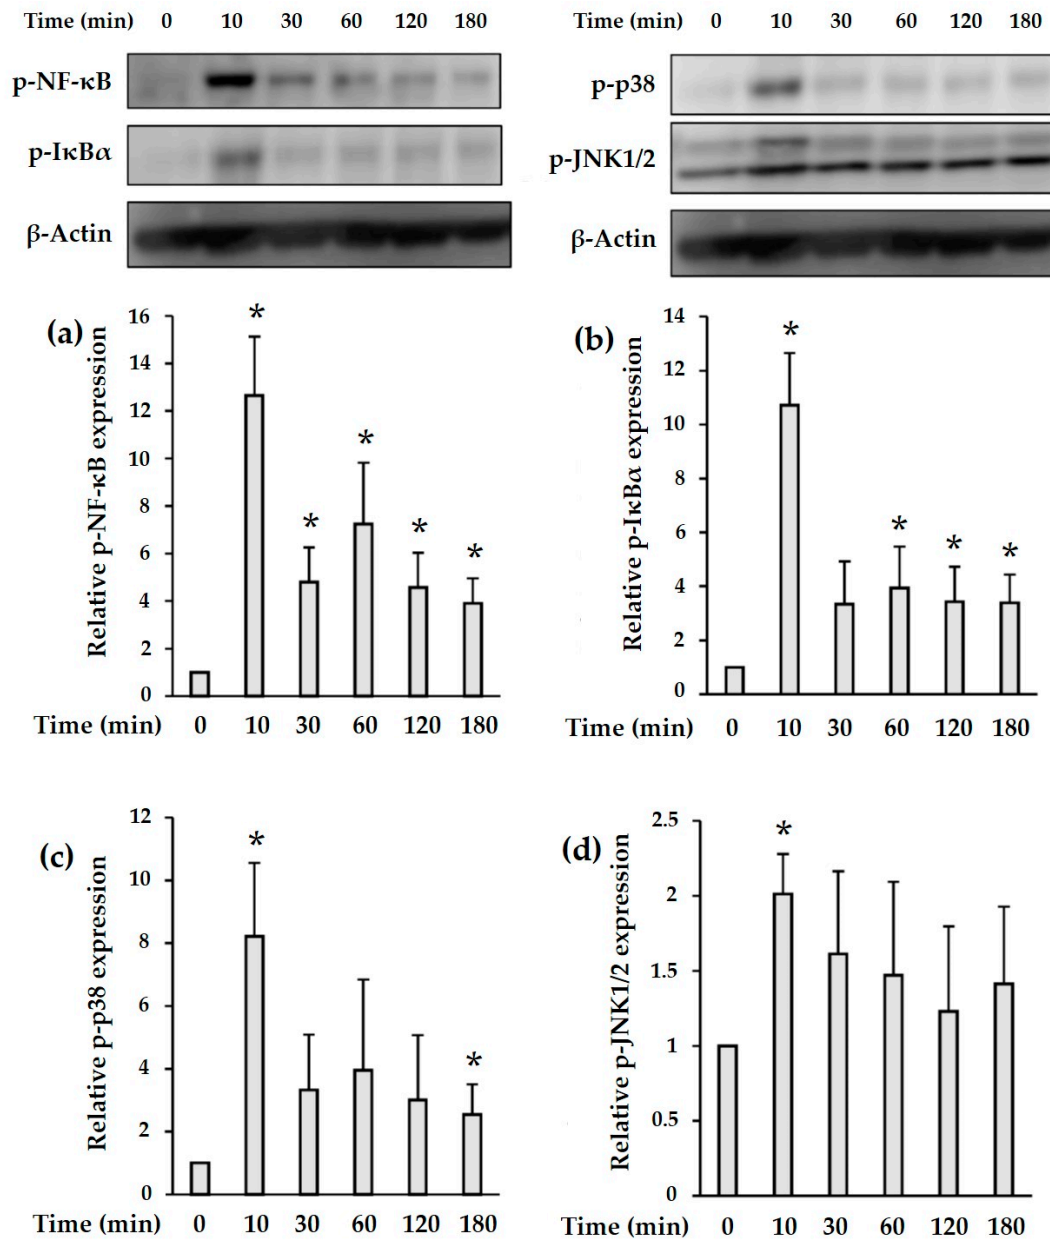

**Figure S7.** Effects of TNF- $\alpha$  on activation of inflammatory signaling pathways in VECs

Vascular endothelial cells were treated with 1 ng/mL TNF- $\alpha$  for 10, 30, 60, 120 and 180 min. The levels of (a) p-NF- $\kappa$ B, (b) p-I $\kappa$ B $\alpha$ , (c) p-p38 MAPK (p-p38) and (d) p-JNK1/2 were analyzed by western blotting. Values are shown as means  $\pm$  SD (n = 5) \*p < 0.05 vs. 0 min (ANOVA with post hoc Dunnett tests).
